# Supplementary material
Source: PubMed Central journal article supplement (PMC11005569)
Supplement: NIHPP2023.11.07.566110v3-supplement-1.pdf [file NIHPP2023.11.07.566110v3-supplement-1.pdf]

1184

1185

1186

## Supplementary figures

1187

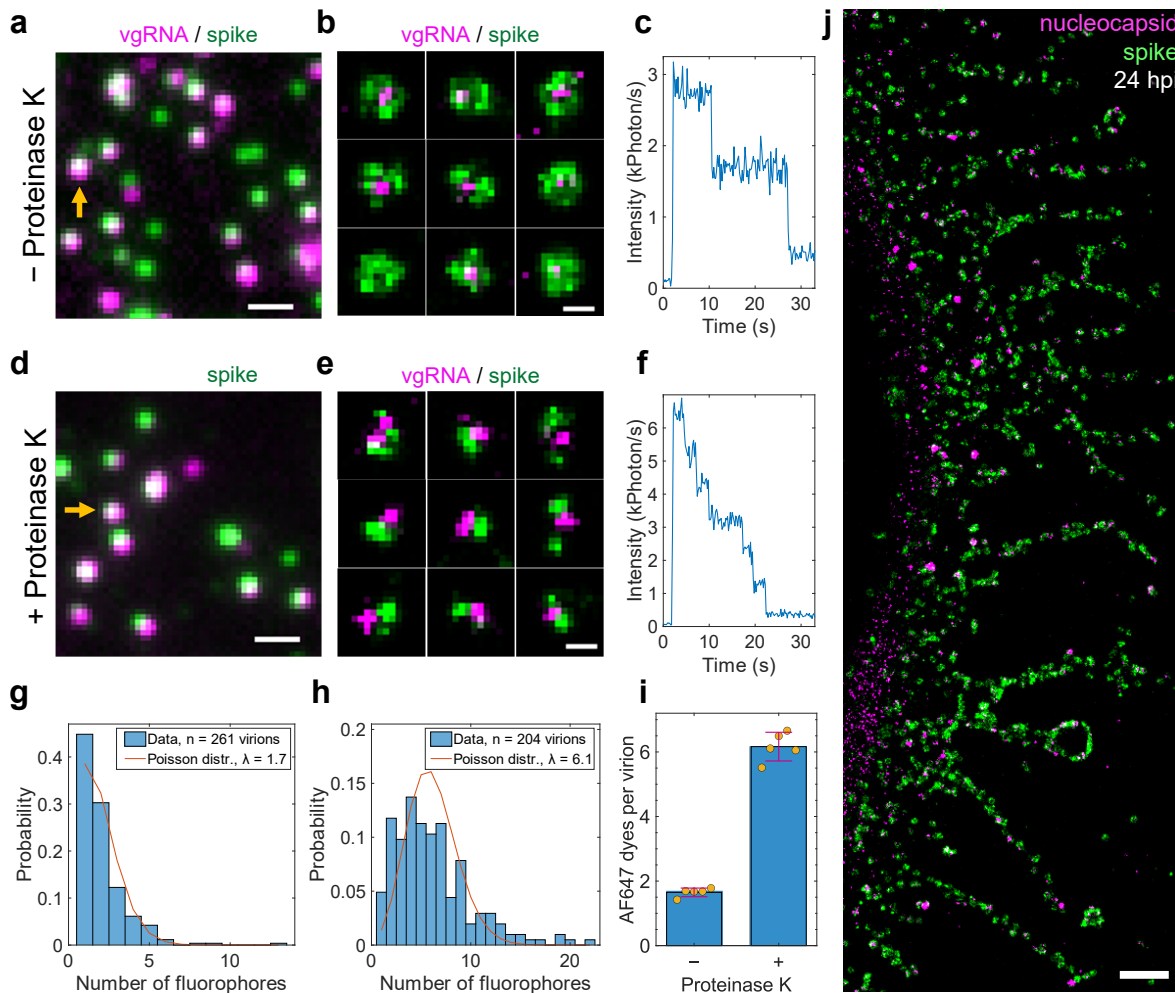

1188

1189 **Fig. S1. Validation of the labeling and imaging approach.**

1190 **a**, DL image of SARS-CoV-2 virions where vgRNA was labeled with AF647 by RNA FISH and the spike  
 1191 proteins were labeled by primary anti-spike S2 antibody with secondary CF568-conjugated antibody. **b**,  
 1192 Representative two-color SR images of individual virions reveal concentric localization of spike around  
 1193 vgRNA. **c**, Bleaching time trace of AF647 emission from a single virion (yellow arrow in **a**) demonstrates  
 1194 two-step bleaching. **d**, DL image of virions that were treated with Proteinase K (PK) before labeling. **e**, SR  
 1195 images of PK-treated virions reveal incomplete spike labeling due to digestion of proteins by the PK. **f**,  
 1196 Bleaching time trace of AF647 emission from a single virion (yellow arrow in **d**) shows 6-step bleaching  
 1197 suggesting increased vgRNA labeling efficiency in PK-treated virions. **g-h**, Histograms of the number of  
 1198 fluorophores per virion in untreated (**g**) or PK-treated (**h**) samples and their fits with a Poisson distribution.  
 1199 **i**, Mean number of AF647 molecules per virion from the fit for 5 different regions in both untreated and  
 1200 PK-treated samples.  $p$ -value =  $2 \cdot 10^{-8}$ , two-tailed  $t$ -test. The error bars indicate mean  $\pm$  SD value for the  
 1201 untreated and PK-treated groups. **j**, SR image of a SARS-CoV-2 infected cell with the cell body to the left  
 1202 reveals assembled virions at its cytoplasmic tubular projections at 24 hpi. Scale bars, 100 nm (**b**, **e**) and 1  
 1203  $\mu$ m (**a**, **d**, **j**).

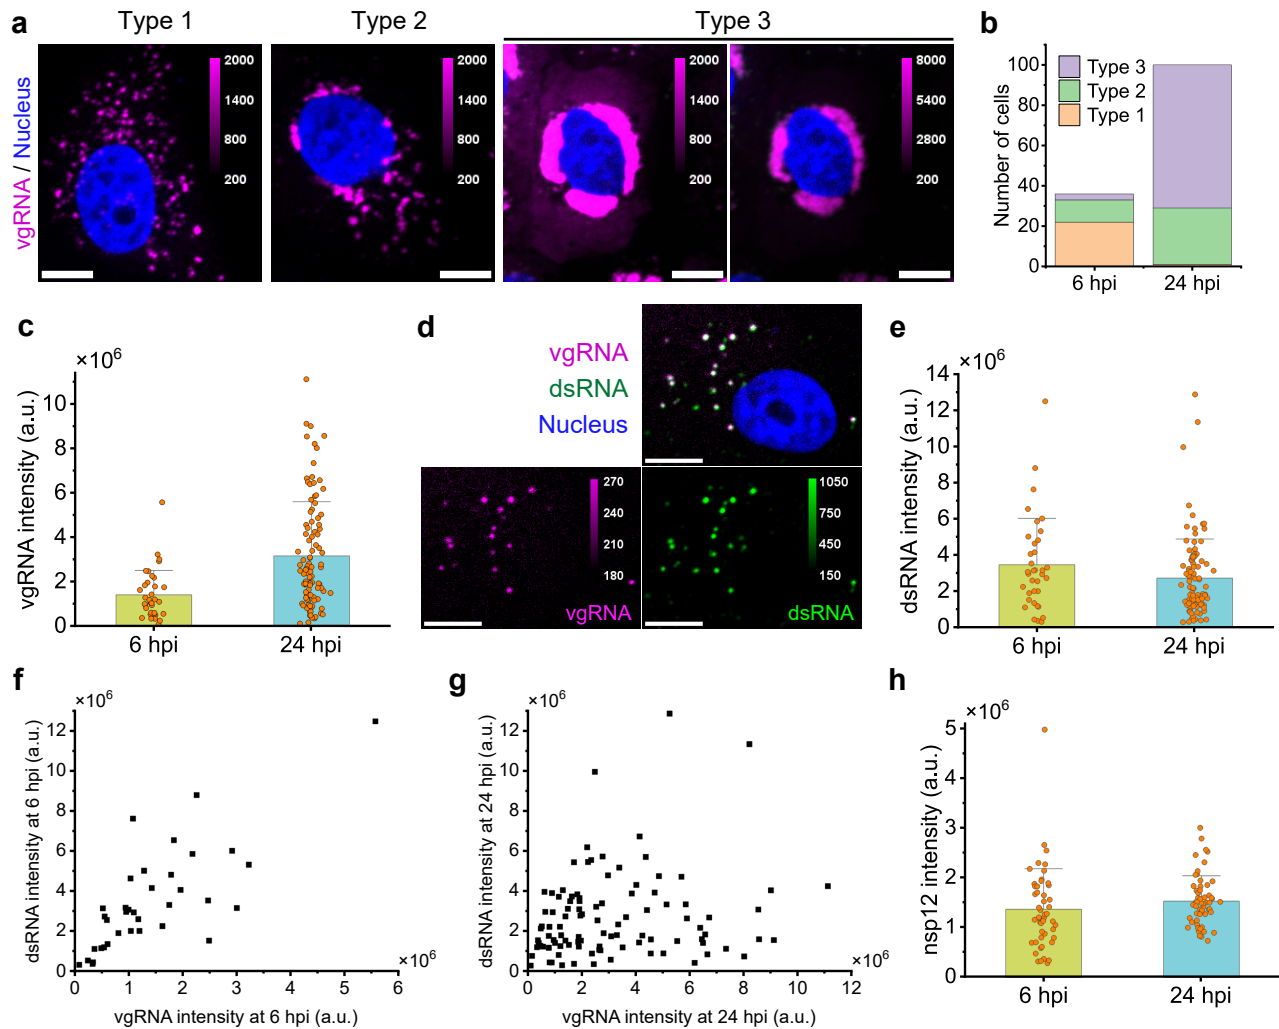

1204

1205 **Fig. S2. Screening and quantification of vgRNA, dsRNA and nsp12 by confocal microscopy.**

1206 **a**, Representative confocal images show three types of vgRNA distribution in SARS-CoV-2 infected  
 1207 cells. **b**, Number of cells assigned to one of the three types at 6 or 24 hpi. **c**, Cell-integrated vgRNA  
 1208 signal significantly increases from 6 hpi to 24 hpi. p-value =  $6 \cdot 10^{-8}$ , two-tailed t-test. **d**,  
 1209 Representative confocal image of vgRNA and dsRNA in an early type 1 cell suggests colocalization  
 1210 between these targets. **e**, Cell-integrated signal of immunofluorescently detected dsRNA in SARS-  
 1211 CoV-2 infected cells does not significantly change from 6 hpi to 24 hpi. p-values = 0.13, two-tailed  
 1212 t-test. **f**, dsRNA signal correlates with vgRNA signal at 6 hpi (Pearson's  $r = 0.76$ ). **g**, dsRNA signal  
 1213 does not correlate with vgRNA signal at 24 hpi (Pearson's  $r = 0.18$ ). **h**, Cell-integrated signal of  
 1214 immunofluorescently detected nsp12 in SARS-CoV-2 infected cells does not significantly change  
 1215 from 6 hpi to 24 hpi. p-value = 0.23, two-tailed t-test. Error bars represent mean + SD of the values  
 1216 from individual cells. Scale bars, 10  $\mu$ m.

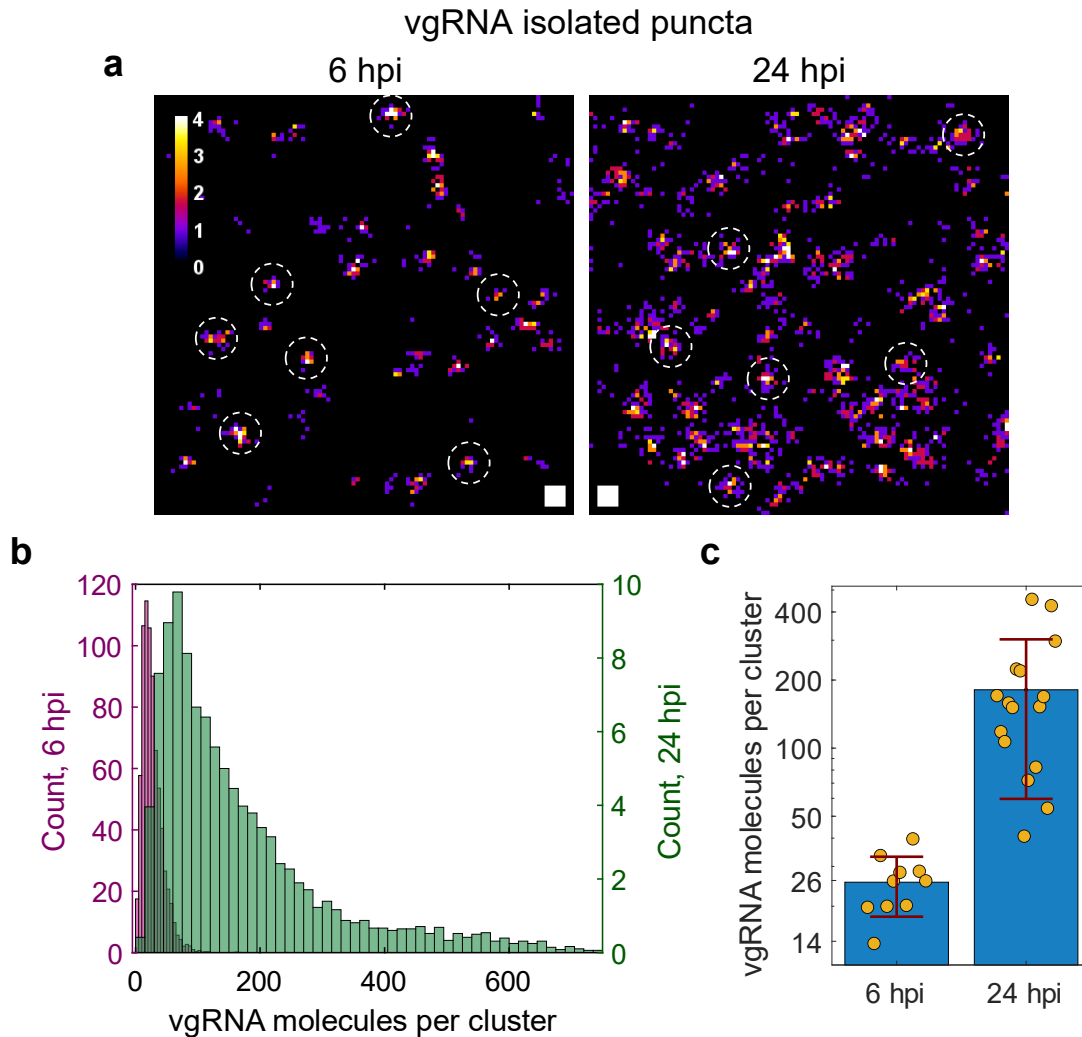

1217

1218 **Fig. S3. Estimation of the number of vgRNA molecules in vgRNA clusters.**

1219 **a**, SR localizations of single vgRNA molecules found in the cytoplasm of infected cells outside the  
1220 dense vgRNA clusters. On a cell-by-cell basis, similar images are used as a calibration for the  
1221 number of SR detections per one vgRNA molecule. Examples of SR images of single vgRNA  
1222 molecules are indicated with white circles ( $r = 50$  nm). **b**, Estimated number of vgRNA molecules  
1223 per cluster at 6 and 24 hpi from all analyzed cells. The histogram counts are normalized by the  
1224 number of analyzed cells; the histogram counts for 24 hpi were additionally divided by 3 to  
1225 account for the 3x wider bin size than at 6 hpi. **c**, Median estimated counts of vgRNA molecules  
1226 per cluster for each analyzed cell (individual yellow points). The error bars represent mean  $\pm$  SD  
1227 values of these median vgRNA molecule counts for each time point. P-value =  $5 \cdot 10^{-4}$ , two-tailed  
1228 t-test. Scale bars,  $50 \times 50$  nm<sup>2</sup>.

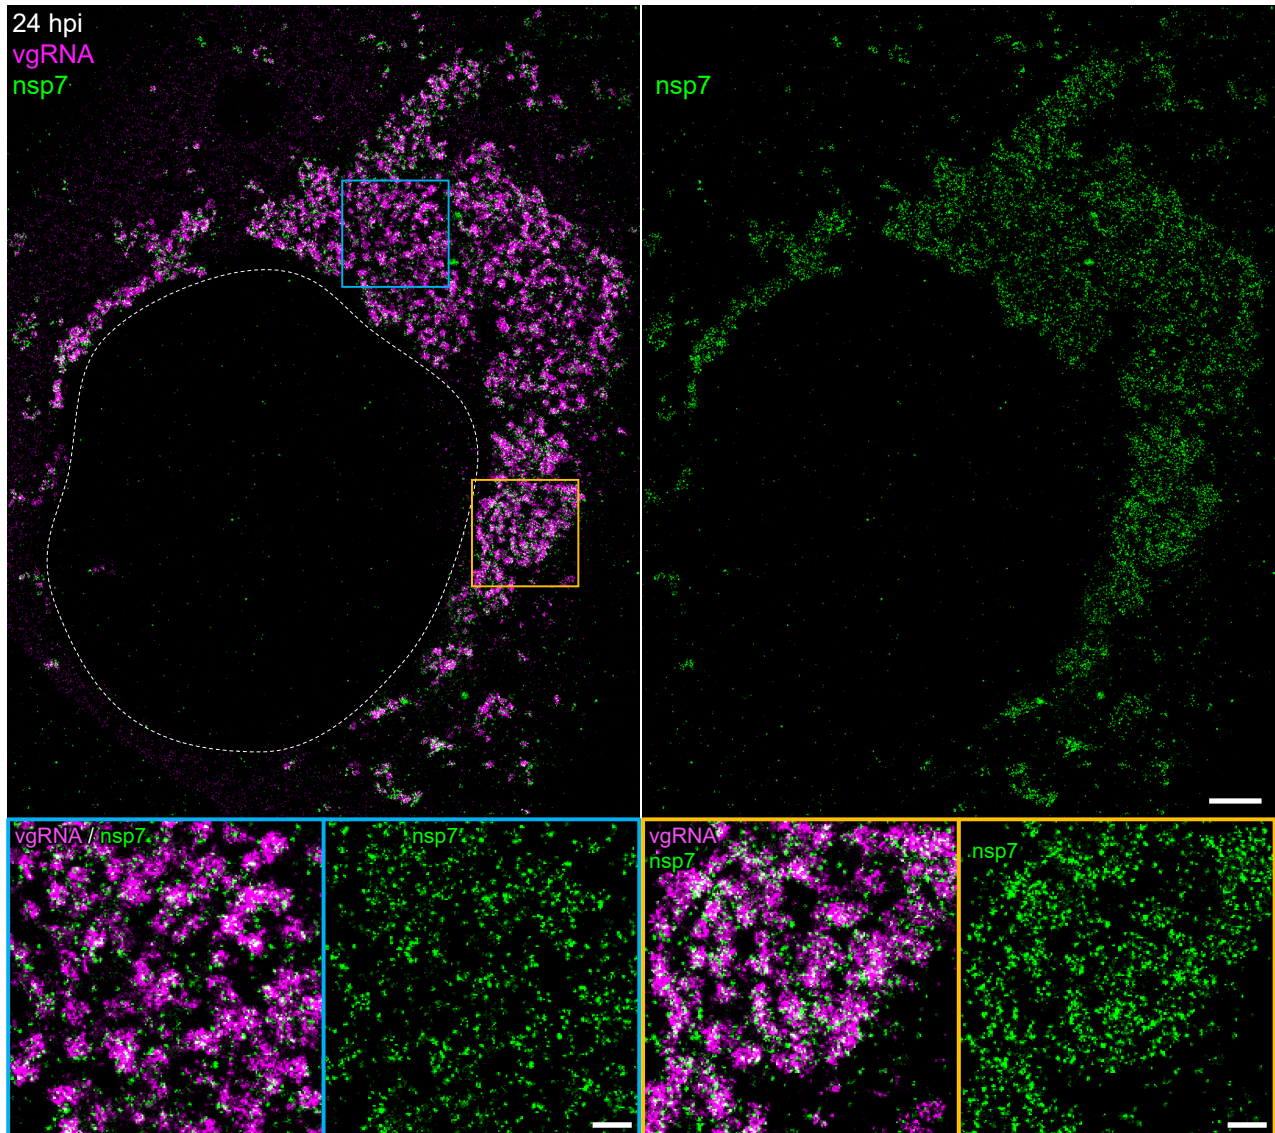

1229

1230

1231 **Fig. S4. Association of nsp7 with perinuclear vgRNA structures.**

1232 Representative SR image of a SARS-CoV-2 infected cell at 24 hpi labeled for vgRNA (magenta) and

1233 nsp7 (green) with magnified regions shown in the colored boxes. Scale bars, 2  $\mu$ m and 500 nm

1234 (bottom panels).

1235

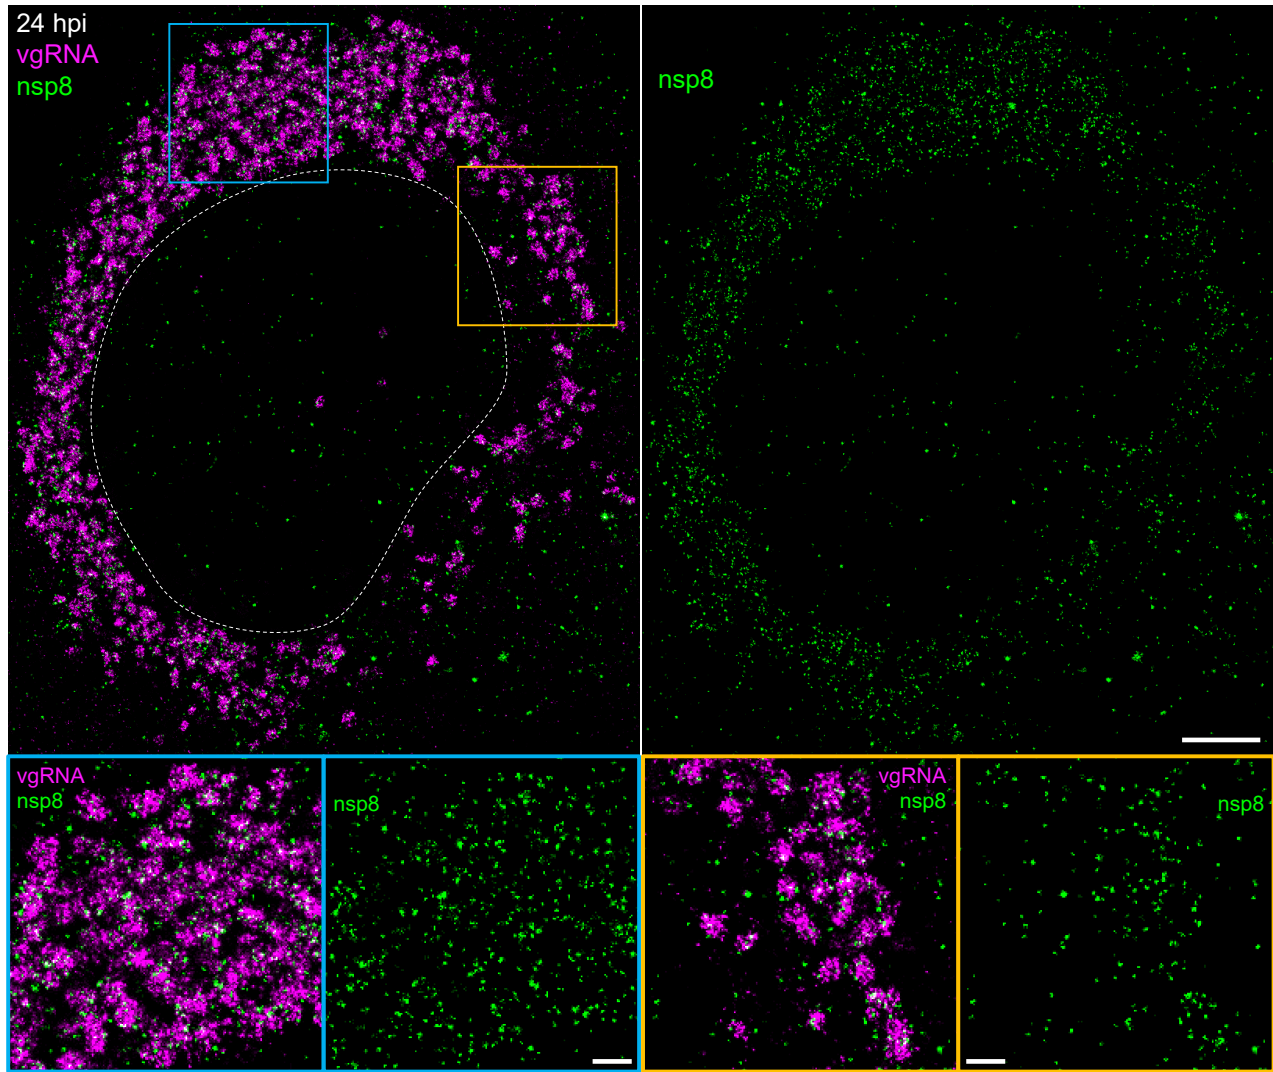

1236

1237

1238 **Fig. S5. Association of nsp8 with perinuclear vgRNA structures.**

1239 Representative SR image of a SARS-CoV-2 infected cell at 24 hpi labeled for vgRNA (magenta) and

1240 nsp8 (green) with magnified regions shown in the colored boxes. Scale bars, 2  $\mu$ m and 500 nm

1241 (bottom panels).

1242

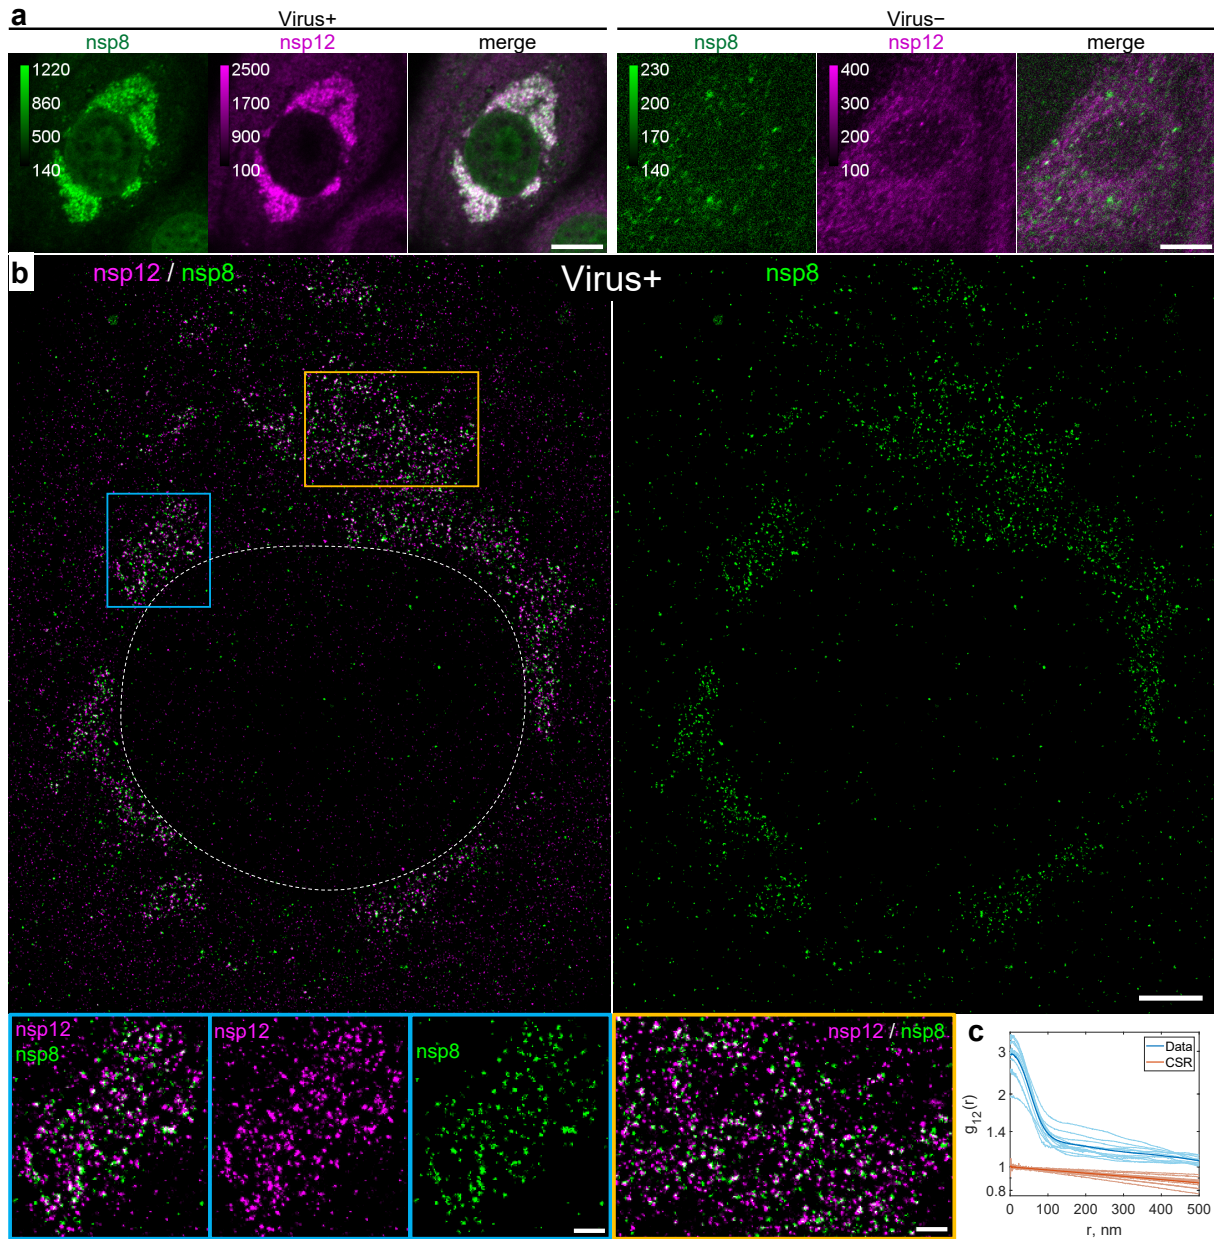

1243

1244 **Fig. S6. Colocalization of nsp12 with nsp8.**

1245 **a**, Representative confocal images of cells co-labeled for nsp8 and nsp12 demonstrate their DL  
 1246 colocalization in the perinuclear region of infected cells (Virus+, 24 hpi) and low background  
 1247 immunofluorescence signal in non-infected cells (Virus-). **b**. Representative SR image of an infected cell at  
 1248 24 hpi reveals punctate localization of both nsp12 and nsp8 in the perinuclear region. (bottom panels)  
 1249 Magnified images of the regions in the colored boxes reveal nanoscale colocalization of nsp12 with nsp8.  
 1250 **c**. Bivariate pair-correlation functions calculated in the perinuclear regions of infected cells demonstrate  
 1251 colocalization of nsp12 and nsp8 at  $r < 100$  nm. Scale bars, 10 μm (**a**), 2 μm (**b**) and 500 nm (bottom  
 1252 panels).

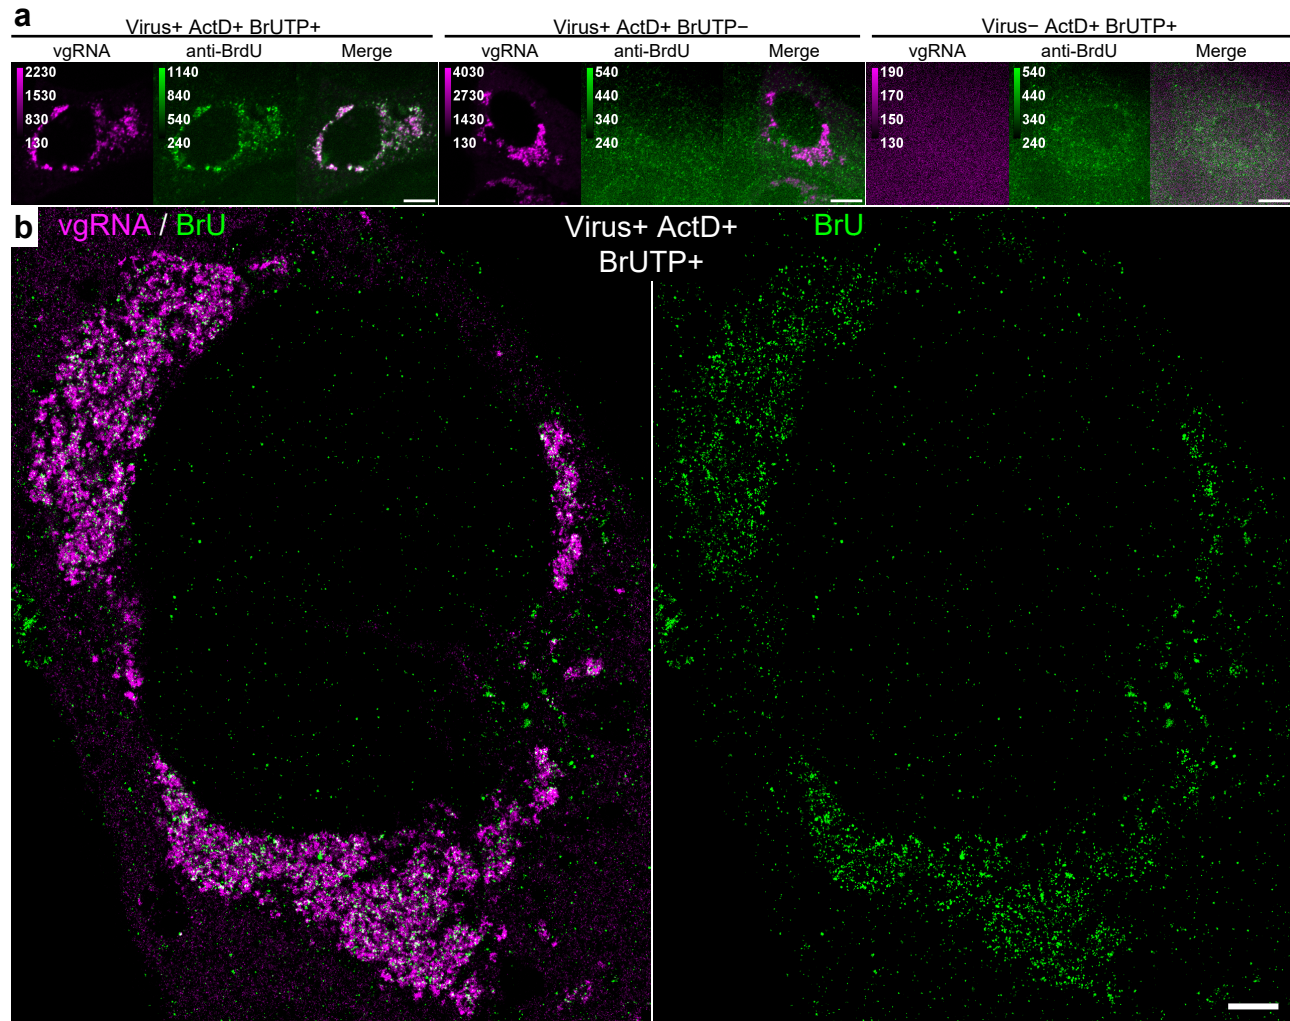

1253

1254 **Fig. S7. Association of newly synthesized viral RNAs with perinuclear clusters of vgRNA.**

1255 **a**, Representative confocal images of cells co-labeled for vgRNA and BrU demonstrate their DL  
1256 colocalization in the perinuclear region of infected cells treated with BrUTP for 1 h before fixation  
1257 (Virus+ BrUTP+); low background BrU signal in infected cells not treated with BrUTP (Virus+  
1258 BrUTP-) and low background signal of both targets in non-infected cells treated with BrUTP for 1  
1259 h (Virus- BrUTP+). Endogenous transcription was inhibited with Actinomycin D in all conditions  
1260 (ActD+). Virus+ cells were fixed at 24 hpi. **b**. Representative SR image of an infected cell at 24 hpi  
1261 treated with BrUTP and Actinomycin D demonstrates association of BrU labeling with vgRNA  
1262 clusters. Scale bars, 10  $\mu$ m (**a**), 2  $\mu$ m (**b**).



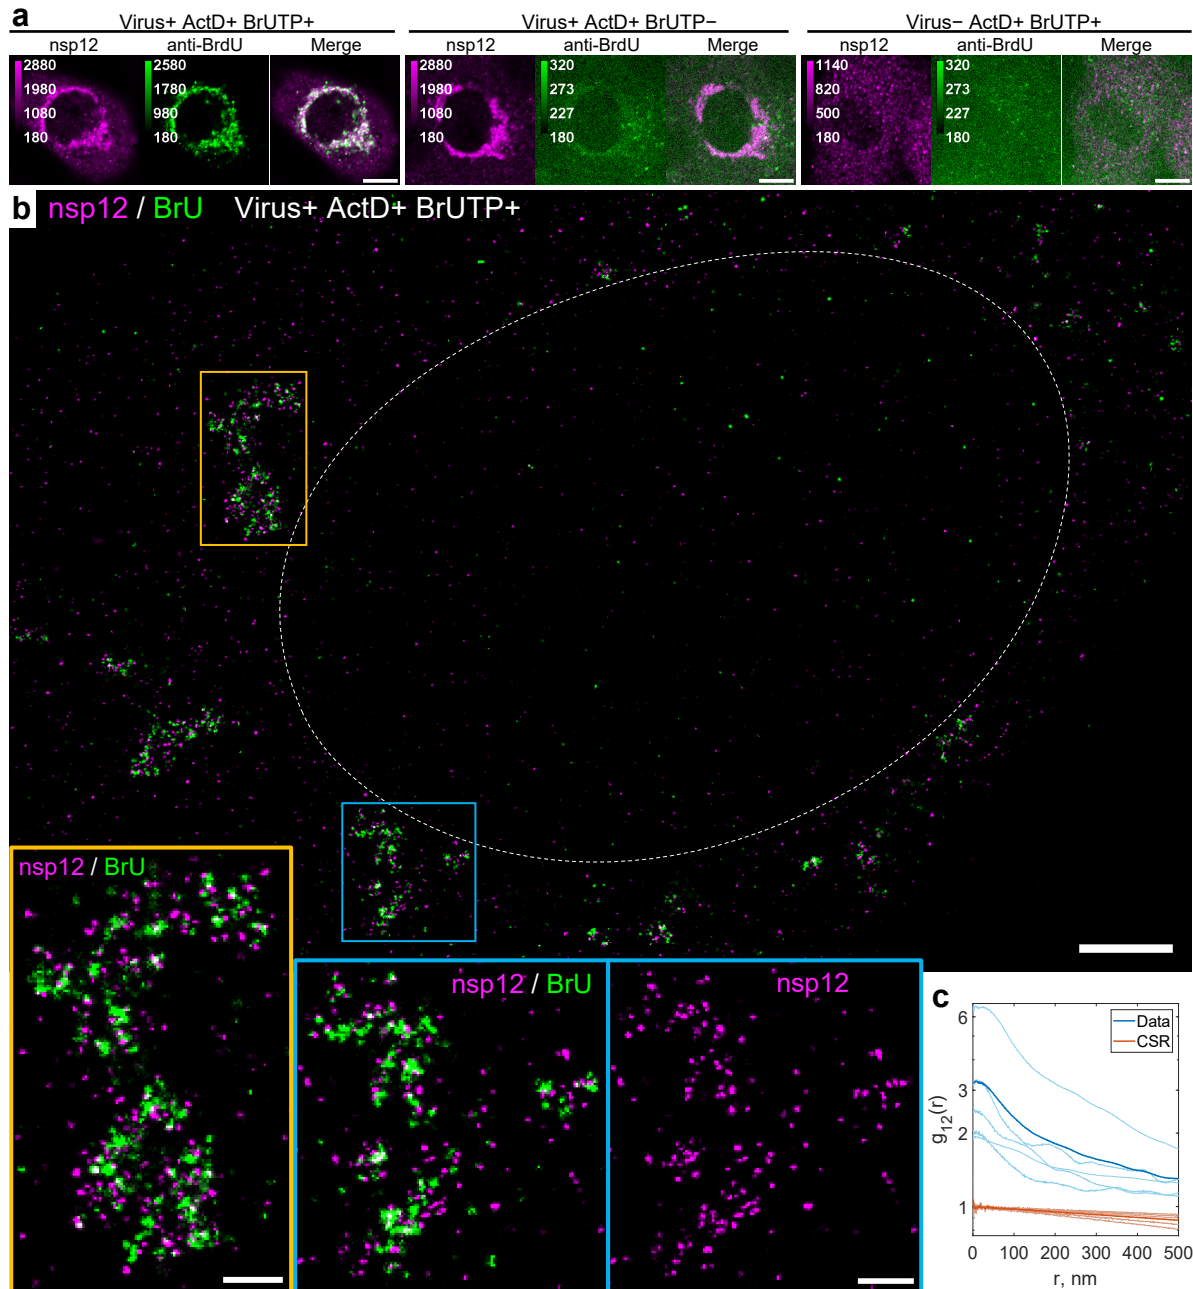

1263

1264 **Fig. S8. Association of newly synthesized viral RNAs with nsp12.**

1265 **a**, Representative confocal images of cells co-labeled for nsp12 and BrU demonstrate their DL  
 1266 colocalization in the perinuclear region of infected cells treated with BrUTP for 1 h (Virus+ BrUTP+); low  
 1267 background BrU signal in infected cells not treated with BrUTP (Virus+ BrUTP-); and low background signal  
 1268 of both targets in non-infected cells treated with BrUTP for 1 h (Virus- BrUTP+). Endogenous transcription  
 1269 was inhibited with Actinomycin D in all conditions (ActD+). Virus+ cells were fixed at 24 hpi. **b**. SR image of  
 1270 an infected cell (type 1, early infection) treated with BrUTP demonstrates association of BrU labeling with  
 1271 nsp12. **c**. Bivariate pair-correlation functions calculated in the perinuclear regions of infected and BrUTP-  
 1272 treated cells reveal nanoscale association of nsp12 and BrU. Scale bars, 10  $\mu$ m (**a**), 2  $\mu$ m (**b**) and 500 nm  
 1273 (bottom zoomed-in panels).

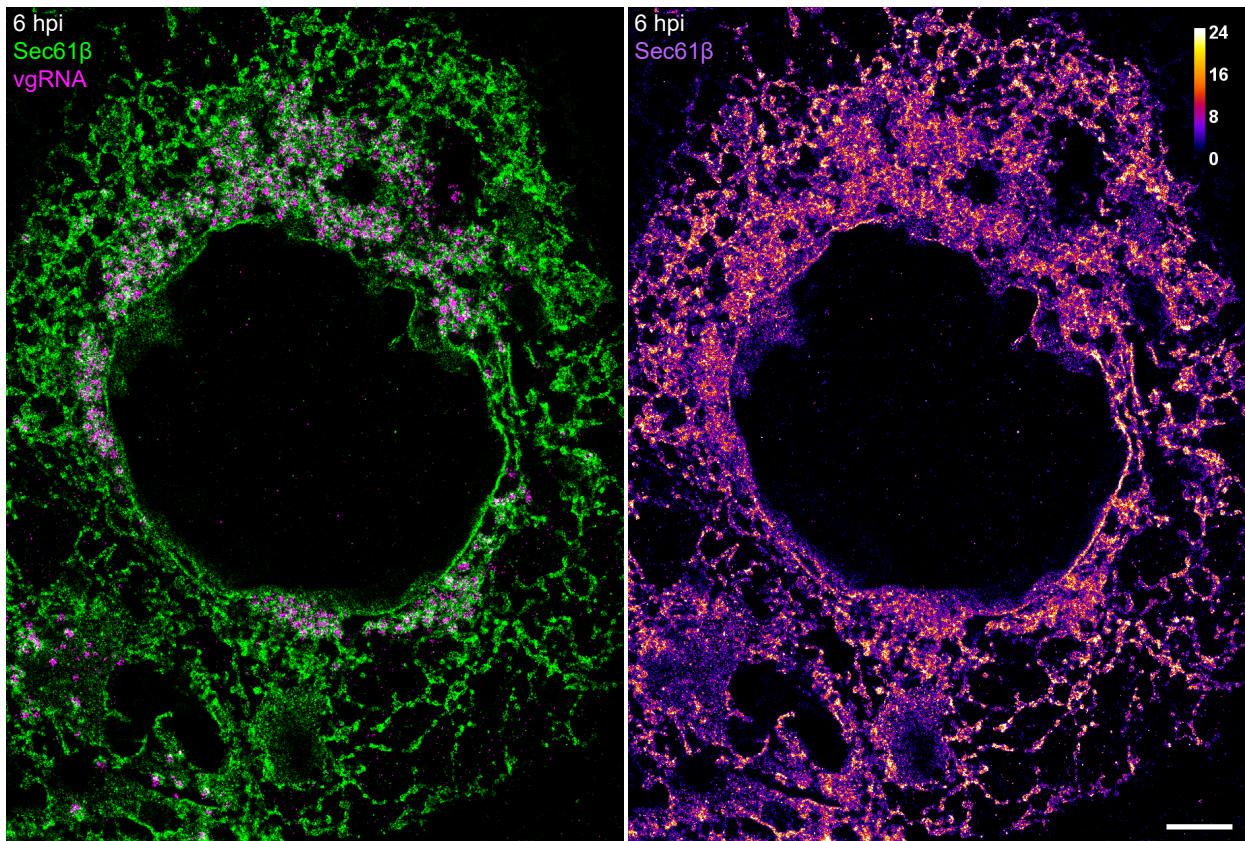

1274

1275

1276

1277 **Fig. S9. Alterations of host cell ER at 6 hpi.**

1278 SR image of vgRNA in a SARS-CoV-2 infected Vero E6 cell, stably expressing Sec61β-GFP. Altered

1279 ER forms ring-like structures that partially encapsulate vgRNA clusters in the perinuclear region.

1280 Left: green (Sec61β) / magenta (vgRNA) coloring; right: color scale of Sec61β localizations. Scale

1281 bar, 2 μm.

1282

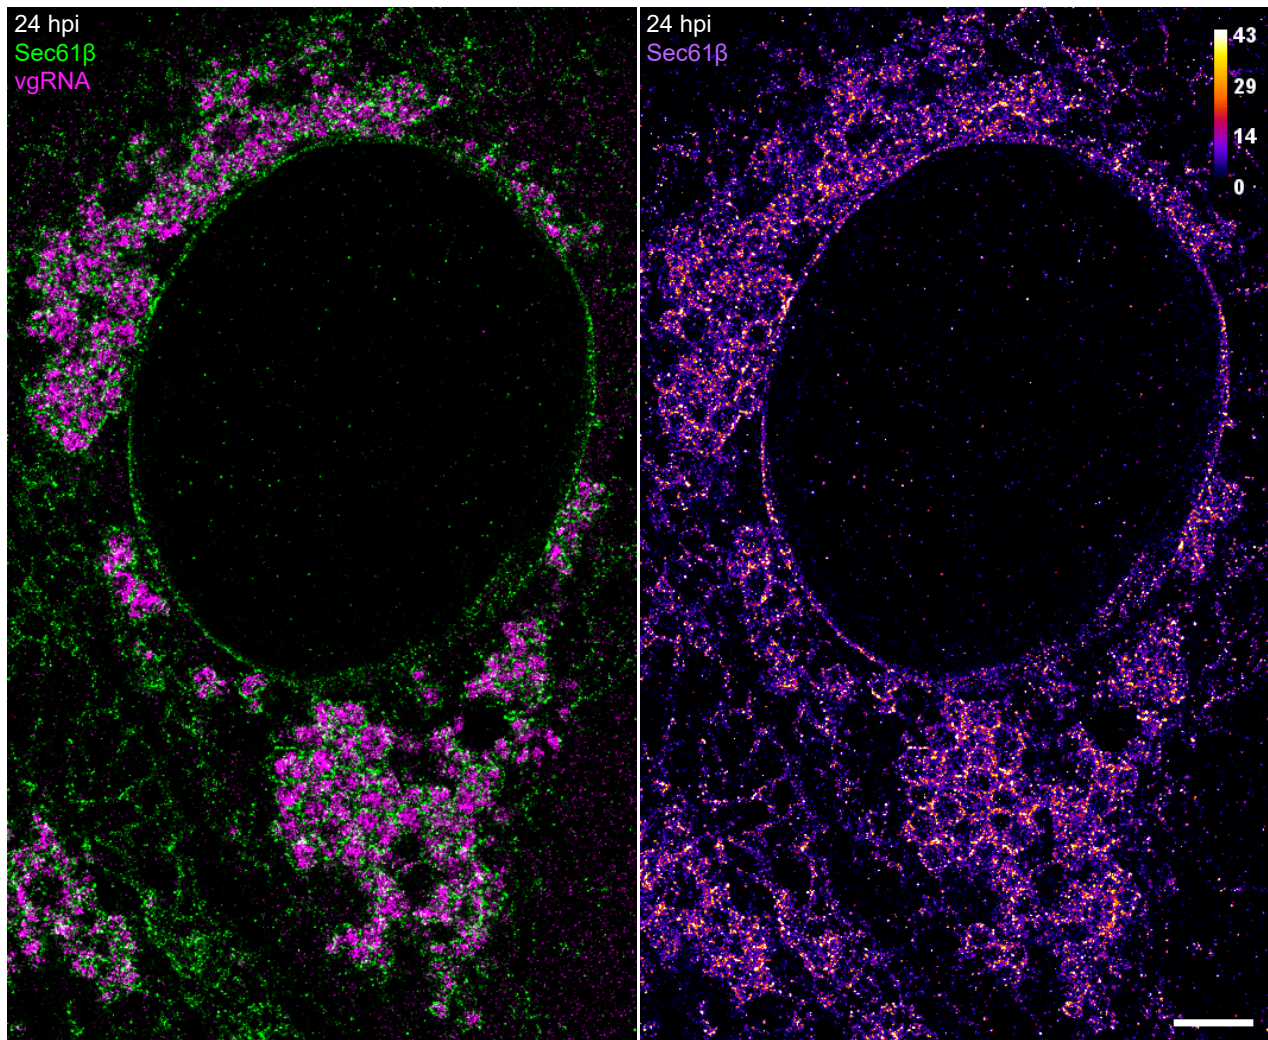

1283

1284

1285

1286 **Fig. S10. Alterations of host cell ER at 24 hpi.**

1287 SR image of vgRNA in a SARS-CoV-2 infected Vero E6 cell, stably expressing Sec61β-GFP. Altered

1288 ER forms ring-like structures that encapsulate vgRNA clusters in the perinuclear region, while the

1289 Sec61β signal at the ER tubules decreases compared to 6 hpi (Fig. S9). Left: green (Sec61β) /

1290 magenta (vgRNA) coloring; right: color scale of Sec61β localizations. Scale bar, 2 μm.

1291

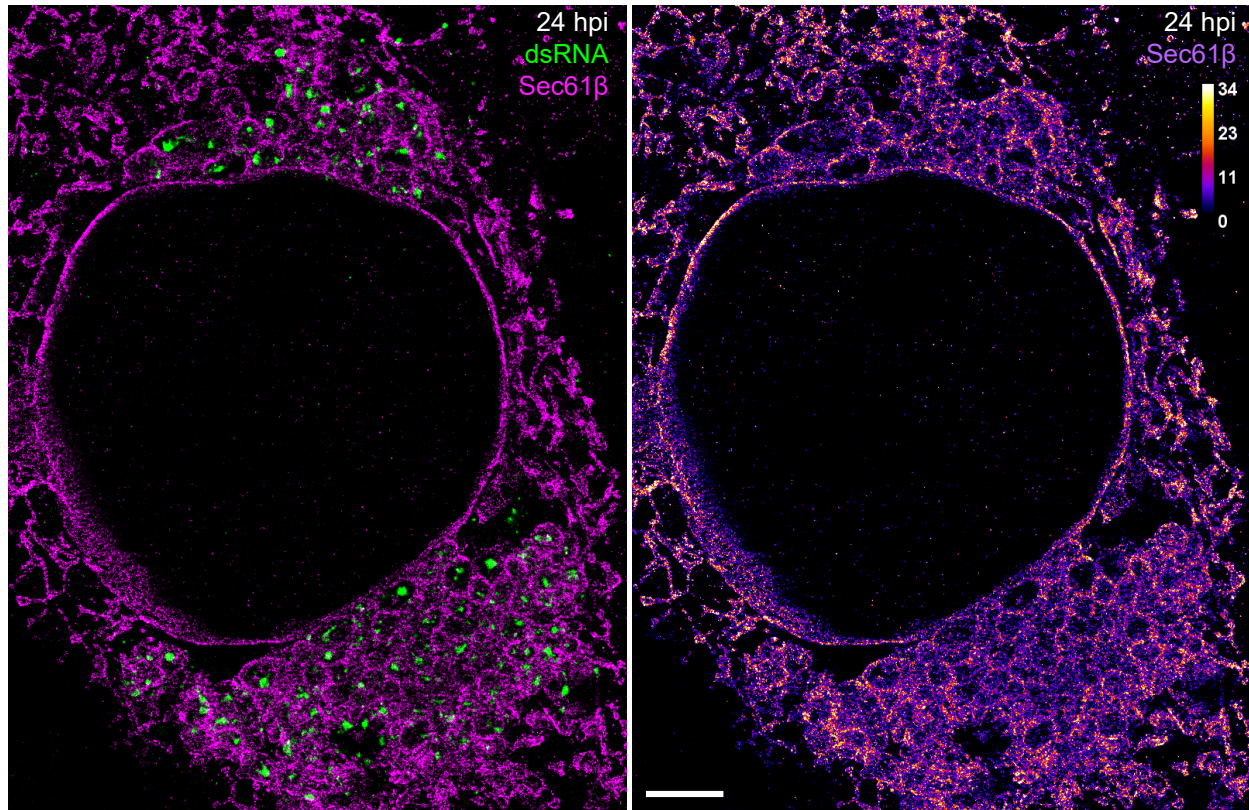

1292

1293

1294

1295 **Fig. S11. Encapsulation of dsRNA by altered host ER at 24 hpi.**

1296 SR image of dsRNA in a SARS-CoV-2 infected Vero E6 cell, stably expressing Sec61β-GFP. Ring-like  
1297 structures of altered ER encapsulate dsRNA clusters in the perinuclear region. Left: green (dsRNA)  
1298 / magenta (Sec61β) coloring; right: color scale of Sec61β localizations. Scale bar, 2 μm.

1299

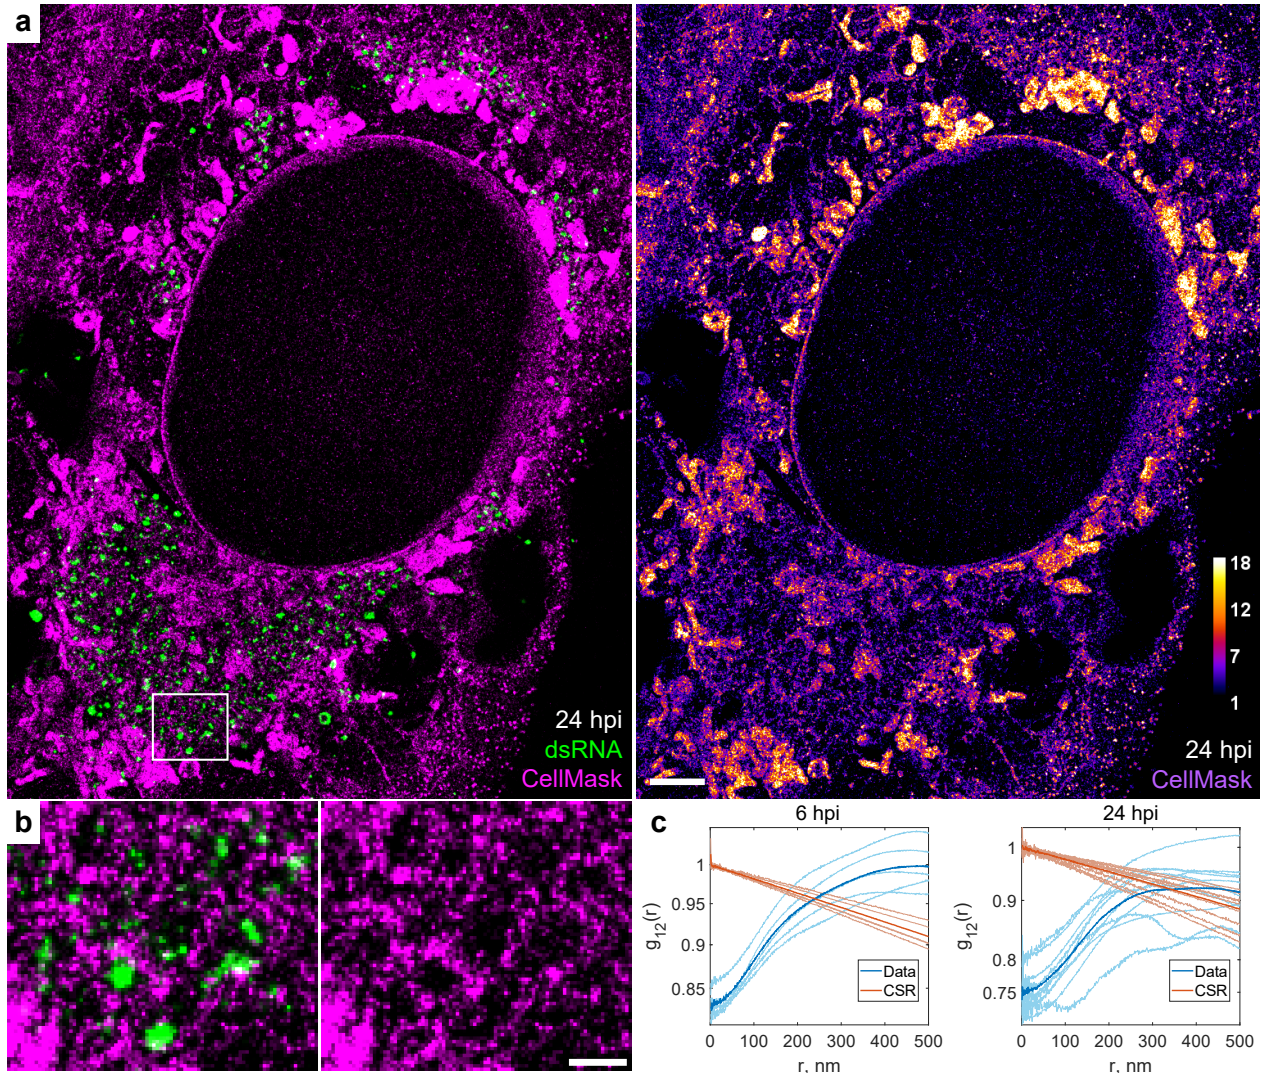

1300

1301

1302 **Fig. S12. Encapsulation of dsRNA into membrane-bound organelles.**

1303 **a**, SR image of dsRNA and membranes in a SARS-CoV-2 infected cell at 24 hpi with membranes  
1304 labeled by CellMask Deep Red (magenta) and dsRNA labeled with immunofluorescence (green).  
1305 CellMask-labeled membranes can be observed around dsRNA clusters. Virions at the plasma  
1306 membrane are seen as bright puncta (right side and lower right corner of the image). **b**, Zoomed-  
1307 in image that corresponds to the white box in **a**. **c**, Bivariate pair-correlation functions indicate  
1308 nanoscale anti-correlation between dsRNA and CellMask, consistent with dsRNA encapsulation  
1309 in membrane-bound organelles at both 6 and 24 hpi. Scale bars, 2  $\mu\text{m}$  (**a**) and 500 nm (**b**).

1310

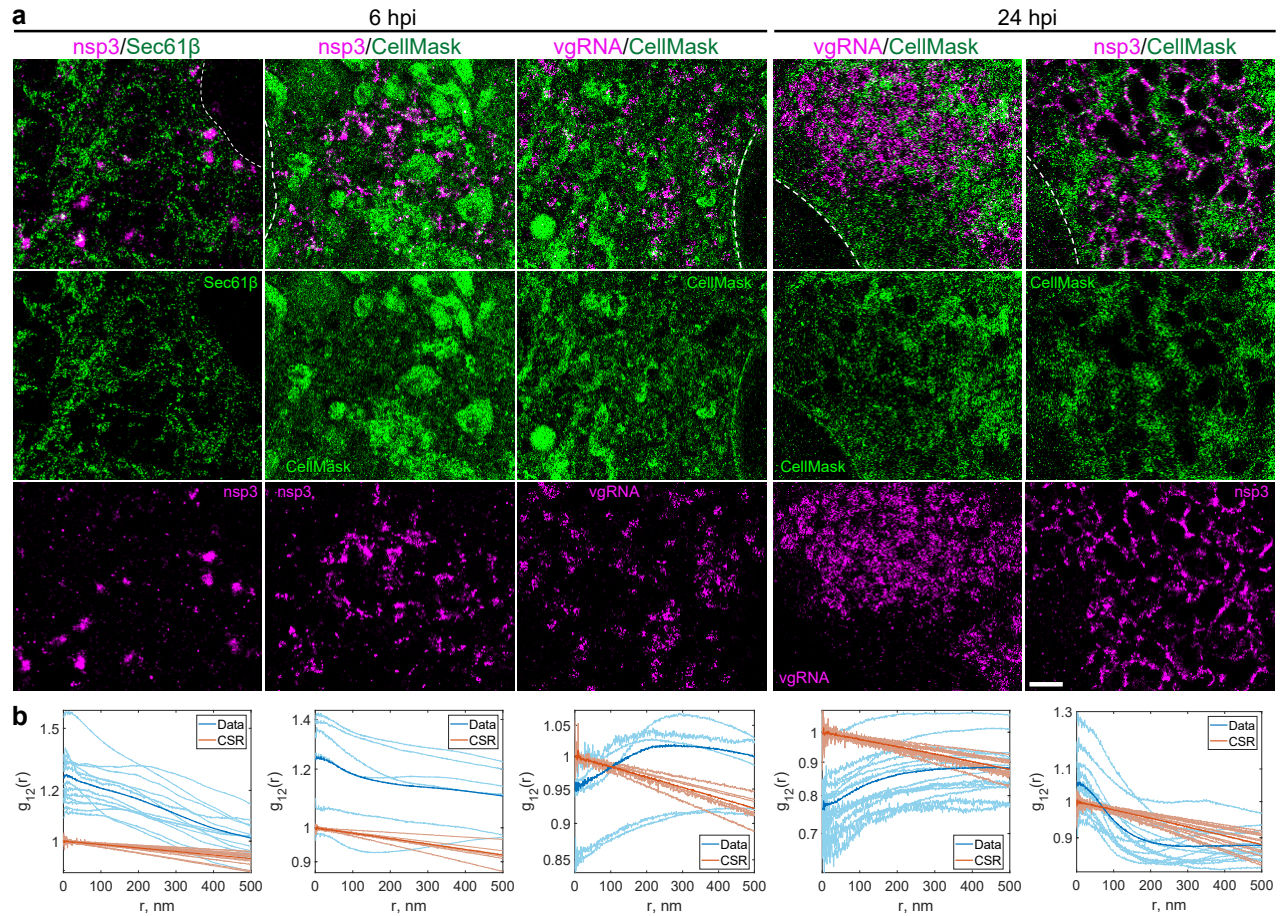

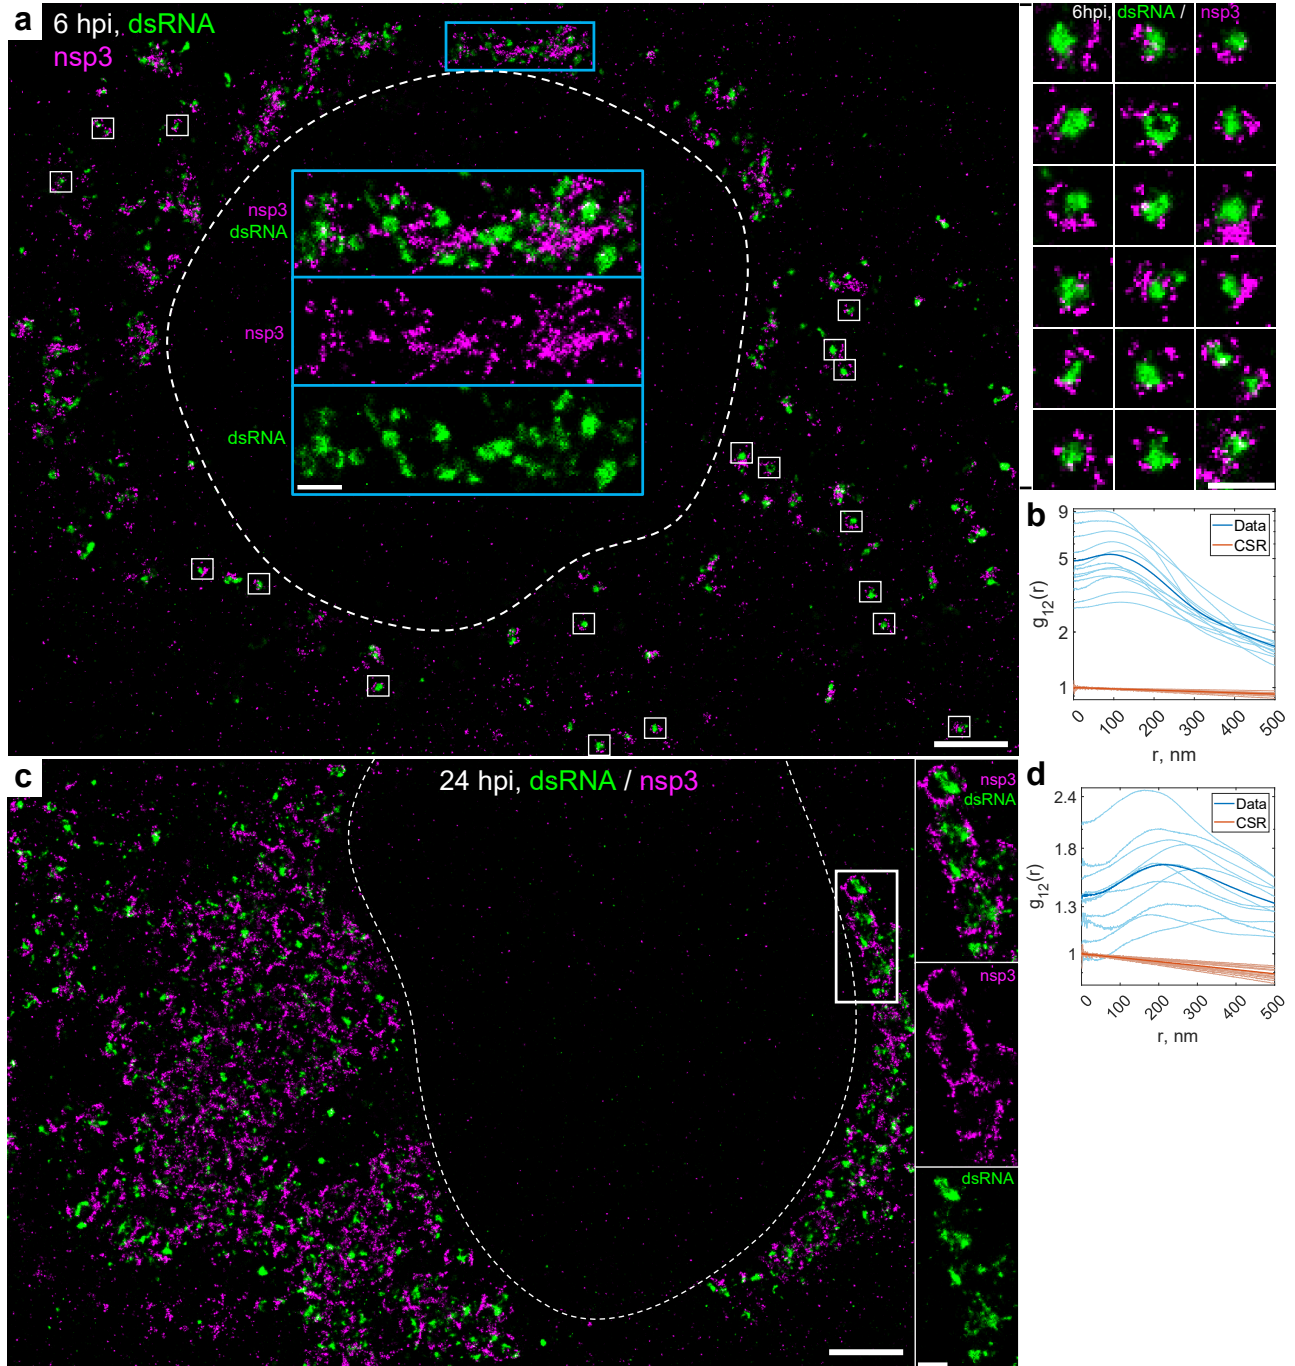

1320

1321 **Fig. S14. Nanoscale anti-correlation of nsp3 with dsRNA.**

1322 **a**, SR image of a SARS-CoV-2 infected cell at 6 hpi with nsp3 and dsRNA labeled by  
1323 immunofluorescence. Nsp3 can be observed at the surface of isolated dsRNA clusters (white boxes &  
1324 right panel) or in dense aggregates between dsRNA clusters (blue box & blue insets). **b**, Bivariate pair-  
1325 correlation functions indicate nanoscale anti-correlation between dsRNA and nsp3 at 6 hpi. **c**, SR  
1326 image of a SARS-CoV-2 infected cell at 24 hpi. Nsp3 forms a network-like pattern that encapsulates  
1327 dsRNA clusters. **d**, Bivariate pair-correlation functions indicate nanoscale anti-correlation between  
1328 dsRNA and nsp3 at 24 hpi. Scale bars, 2  $\mu\text{m}$  (**a**, **c**) and 500 nm (insets in **a**, **c** and right panel in **a**).

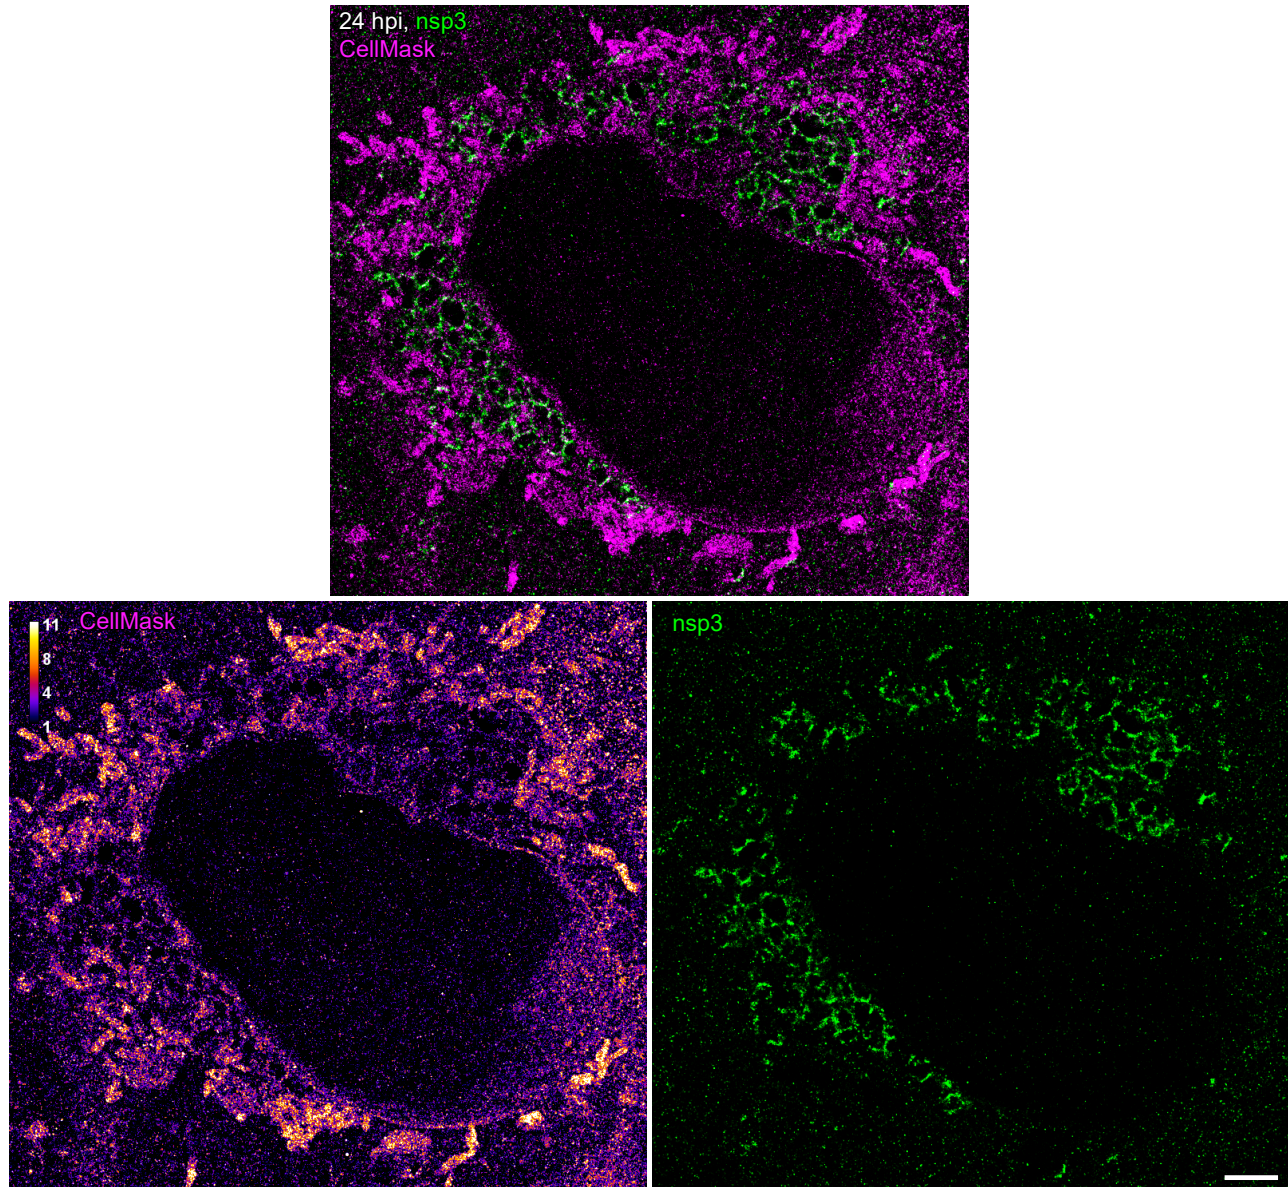

1329

1330

1331 **Fig. S15. Nanoscale colocalization of nsp3 with membranes at 24 hpi.**

1332 SR image of nsp3 (green) and membranes as labeled by CellMask (magenta) in SARS-CoV-2

1333 infected cells at 24 hpi. Nsp3 forms a network-like pattern in the perinuclear region that

1334 colocalizes with the CellMask pattern. Scale bar, 2  $\mu$ m.

1335



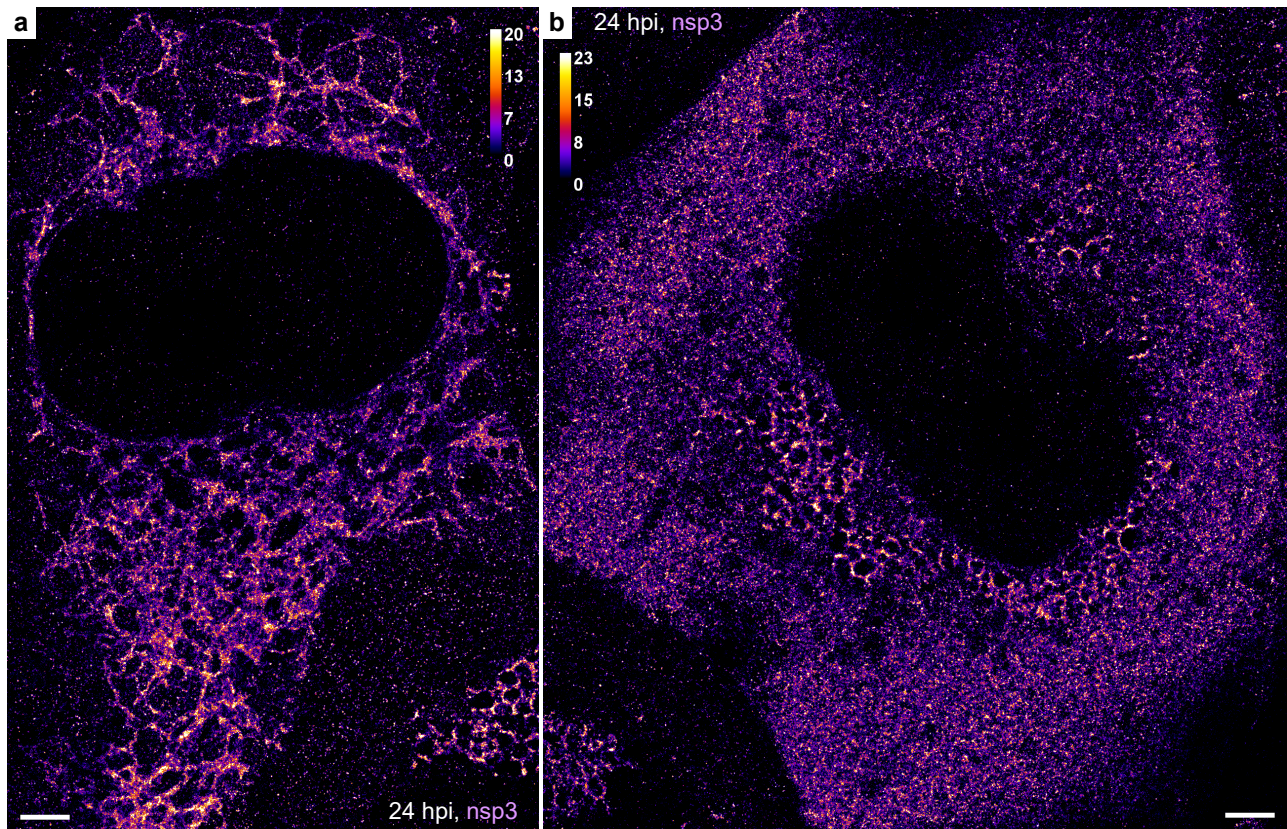

1336

1337

1338

1339 **Fig. S16. Less common patterns of nanoscale nsp3 localization at 24 hpi.**

1340 **a**, Nsp3 forms an ER-like network that occupies a large part of the cytoplasm. **b**, Besides the  
1341 common perinuclear pattern, Nsp3 is also diffusely localized throughout the whole cytoplasm.  
1342 Scale bars, 2 μm.

1343

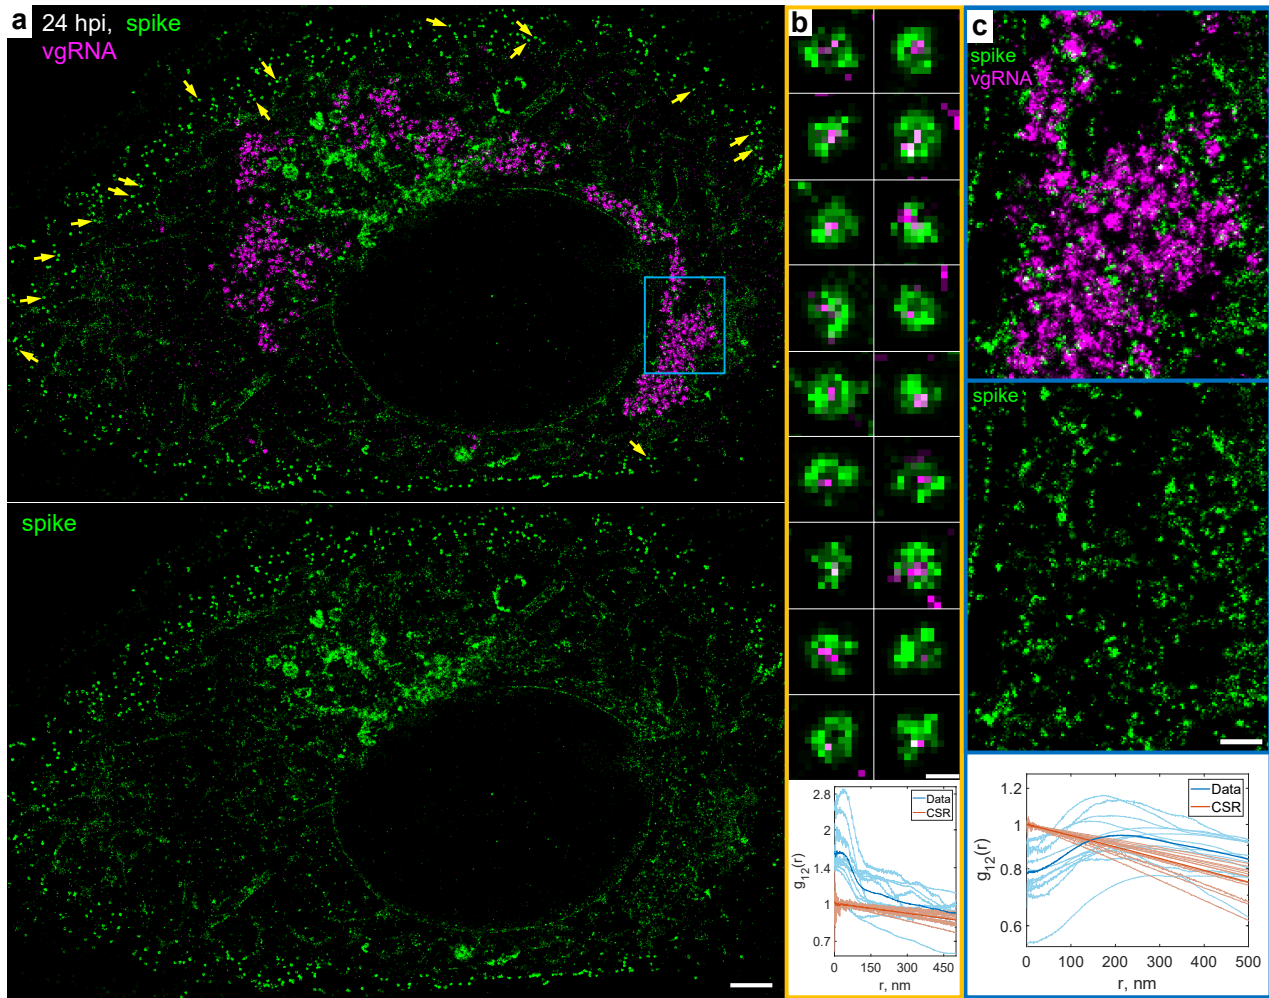

1344

1345

1346 **Fig. S17. Nanoscale localization of spike protein at 24 hpi.**

1347 **a**, SR image of a SARS-CoV-2 infected cell at 24 hpi labeled for spike (green) and vgRNA (magenta).

1348 **b**, Examples of assembled virions encapsulated by the spike proteins and with vgRNA in their  
1349 interior, detected at the cell periphery (yellow arrows in **a**). (bottom panel) Bivariate pair-

1350 correlation functions calculated in the plasma membrane regions indicate colocalization of these

1351 targets at  $r < 100$  nm. **c**, Magnified image that corresponds to the blue frame in **a** displays spike

1352 localizations mostly excluded from the interior of the perinuclear vgRNA clusters with possible

1353 localization at their membrane. (bottom panel) Bivariate pair-correlation functions calculated in

1354 the perinuclear regions of infected cells indicate nanoscale anti-correlation of spike with SARS-

1355 CoV-2 replication organelles. Scale bars, 2  $\mu$ m (**a**), 100 nm (**b**), 500 nm (**c**).

1356

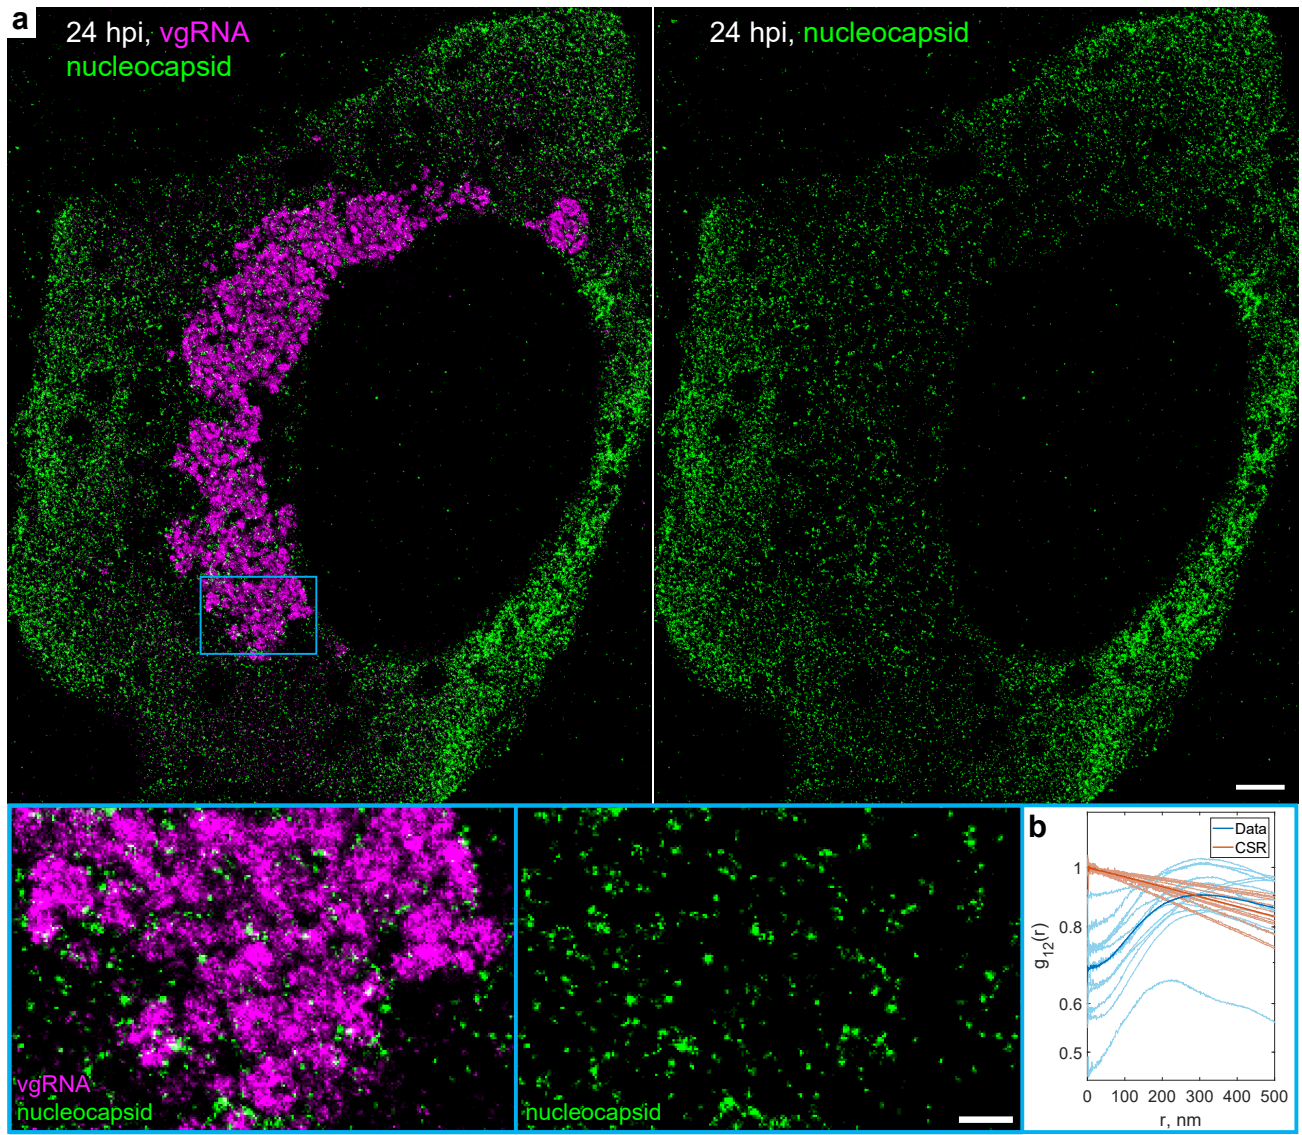

1357

1358

1359 **Fig. S18. Nanoscale anti-correlation of nucleocapsid protein with SARS-CoV-2 replication**  
1360 **organelles at 24 hpi.**

1361 **a**, SR image of a SARS-CoV-2 infected cell at 24 hpi labeled for the nucleocapsid protein (green)  
1362 and vgRNA (magenta). The magnified image in the blue frame displays nucleocapsid protein  
1363 localizations mostly excluded from the interior of the perinuclear vgRNA clusters with possible  
1364 localization at their membrane. **b**, Bivariate pair-correlation functions calculated in the  
1365 perinuclear regions of the infected cells indicate nanoscale anti-correlation of the nucleocapsid  
1366 protein with vgRNA. Scale bars, 2  $\mu\text{m}$  and 500 nm (bottom panels).

1367

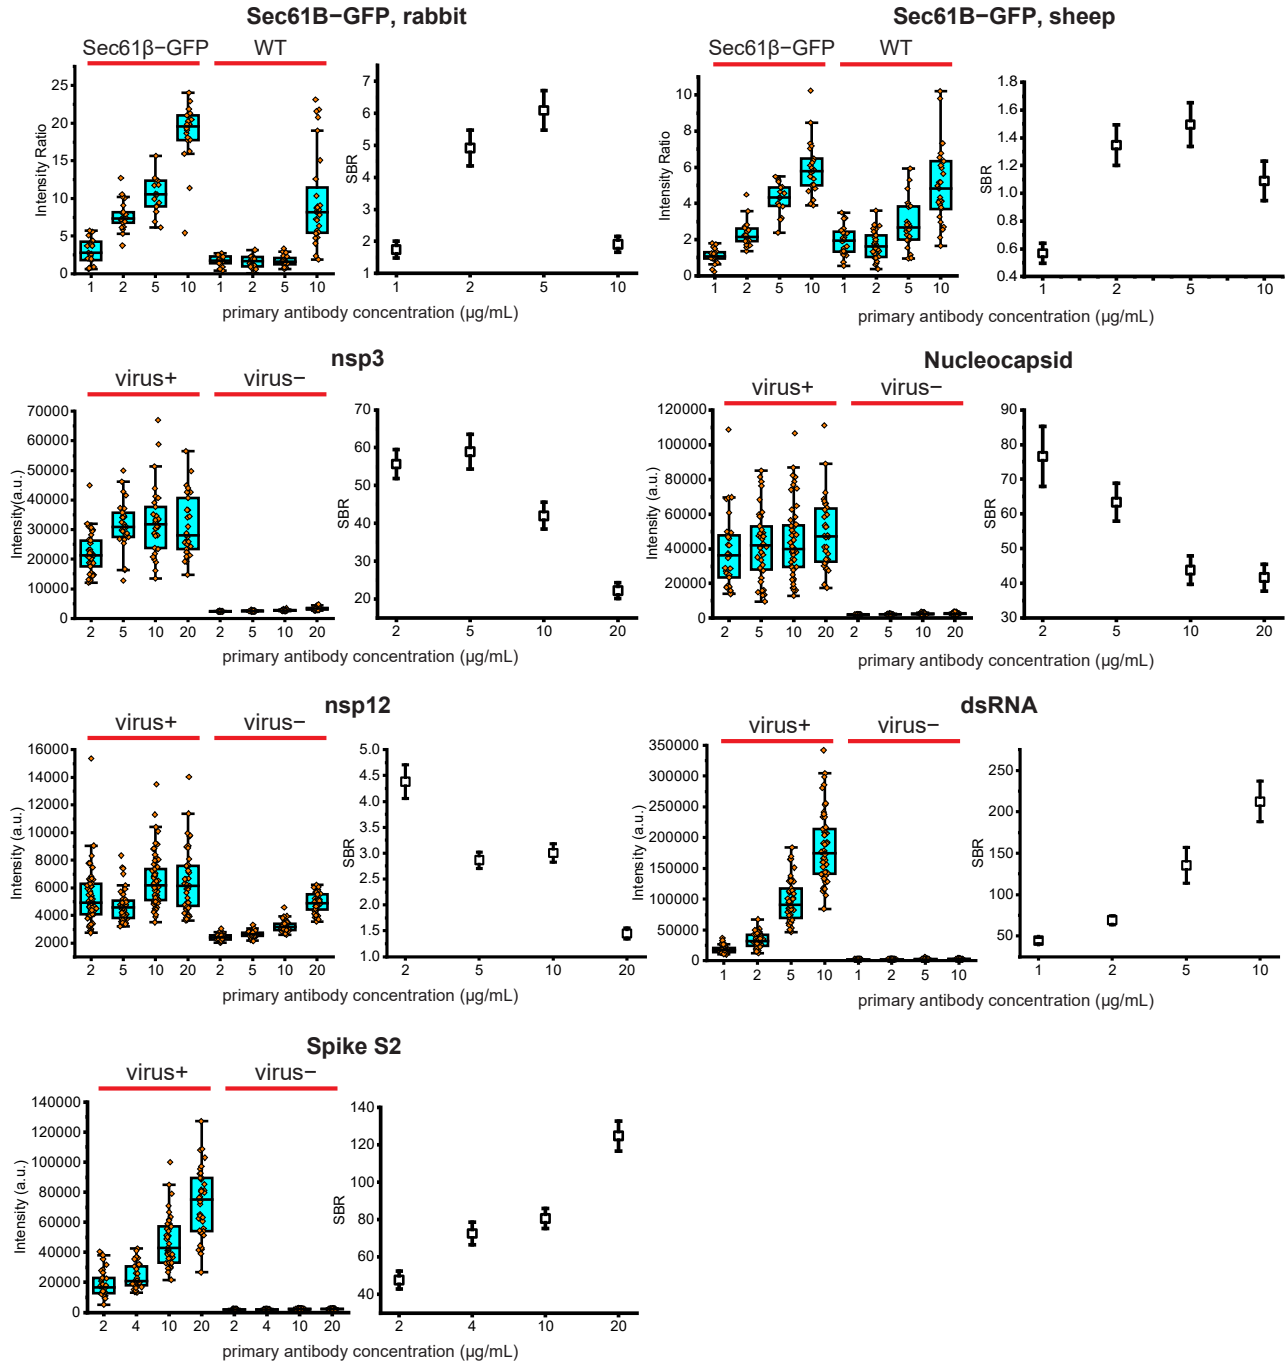

1368

1369 **Fig. S19. Optimization of primary antibody concentrations.**

1370 The concentration of primary antibodies was optimized to minimize the background or to  
1371 maximize the signal to background ratio (SBR) between SARS-CoV-2 infected and non-infected  
1372 cells or between cells expressing Sec61 $\beta$ -GFP and WT cells (see Methods). Box plots: center line,  
1373 median; box limits, upper and lower quartiles; whiskers, 1.5x interquartile range; dots, values for  
1374 individual cells. SBR plots show mean  $\pm$  SD.

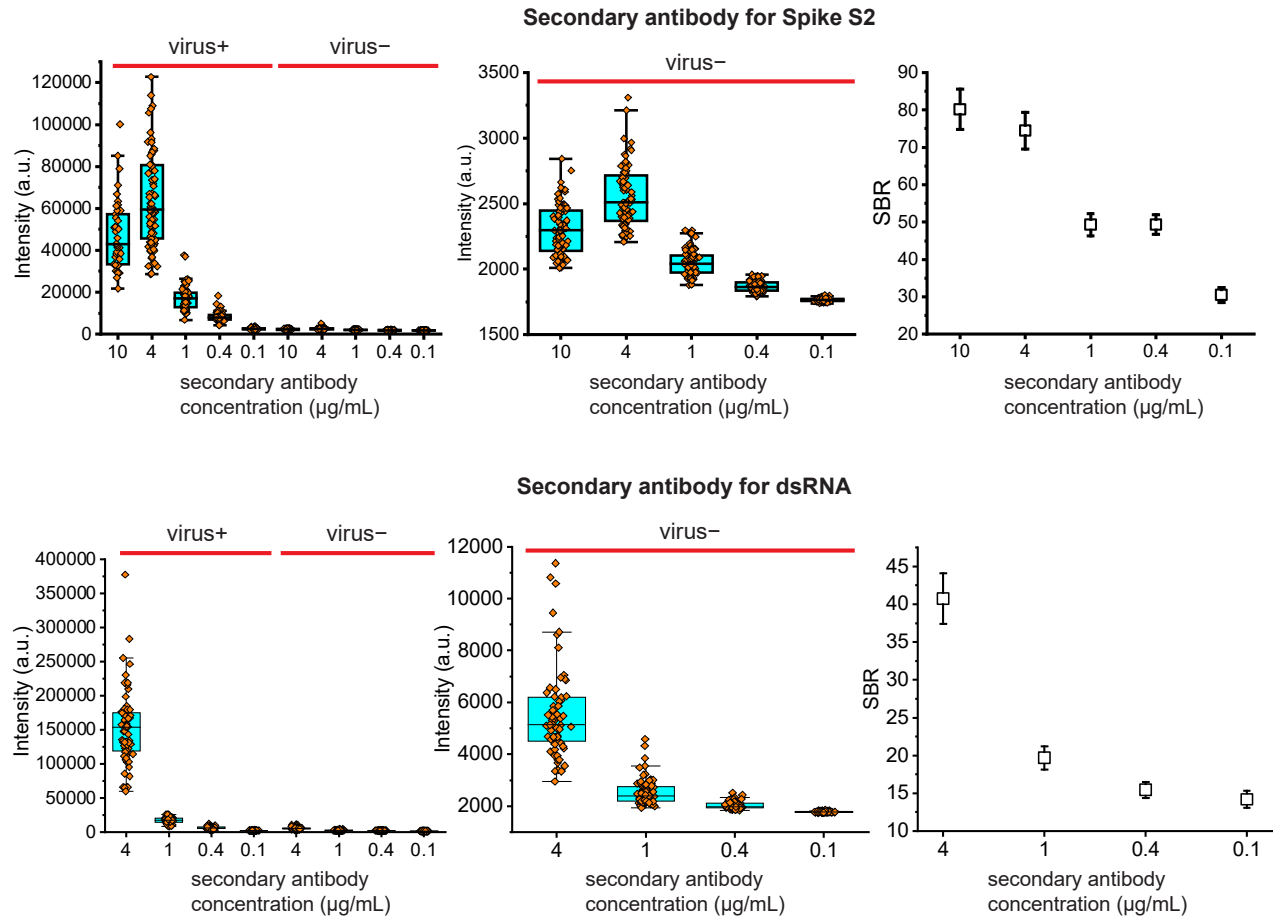

1375

1376

1377

1378

1379 **Fig. S20. Optimization of secondary antibody concentrations.**

1380 The concentration of secondary antibodies was optimized to minimize the background or to  
1381 maximize the SBR between SARS-CoV-2 infected and non-infected cells (see Methods). Box plots:  
1382 center line, median; box limits, upper and lower quartiles; whiskers, 1.5x interquartile range; dots,  
1383 values for individual cells. SBR plots show mean  $\pm$  SD.

1384

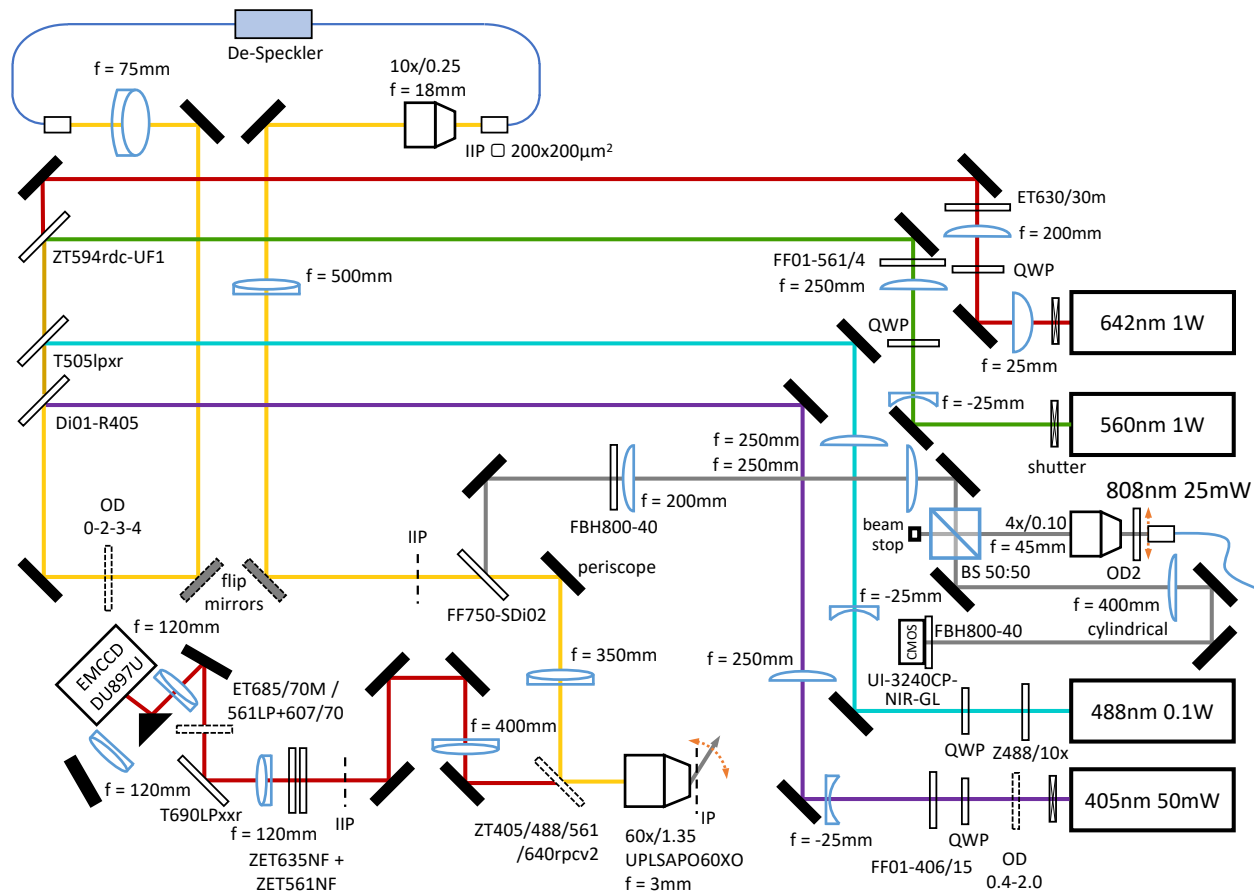

1385

1386

1387

1388

1389 **Fig. S21. Path diagram of SR microscope used in this study.**

1390 Black-filled icons: mirrors; thin empty rectangles: dichroic or neutral density filters; dashed  
 1391 rectangles: movable or motorized components; boxes: cameras or lasers; bent lines: optical fiber;  
 1392 icons with blue edges: lenses or a beam splitter cube; QWP: quarter-wave plate; IP: image plane;  
 1393 IIP: intermediate image plane; BS: beam splitter; OD: optical density. Optics are shown for  
 1394 producing a second image on the EMCCD, but the second path was not used in this study. The  
 1395 gray lines denote the 808 nm beam in the focus lock apparatus.

1396

1397
